# Supplementary material
Source: ML conference proceedings conference paper supplement (https://openaccess.thecvf.com/content/ICCV_2019/html/Wray_Fine-Grained_Action_Retrieval_ICCV_2019_paper.html)
Supplement: Supplementary file 2 [file Wray_Fine-Grained_Action_Retrieval_ICCV_2019_supplemental.zip]

Archive with 2 entries (2 files):
- 3496-supp.mp4
- 3496-supp.pdf
